# Supplementary material for: Lrp6 Genotype affects Individual Susceptibility to Nonalcoholic Fatty Liver Disease and Silibinin Therapeutic Response via Wnt/β-catenin-Cyp2e1 Signaling
Source: PubMed Central journal article supplement (PMC8495406; doi:10.7150/ijbs.63732), 2021-09-21
Supplement: ijbsv17p3936s1.pdf [file ijbsv17p3936s1.pdf]

## ***Additional file***

### ***Lrp6 Genotype Affects Individual Susceptibility to Nonalcoholic Fatty Liver Disease and Silibinin Therapeutic Response via Wnt/ $\beta$ -catenin-Cyp2e1 Signaling***

Li-jie Chen<sup>1,2,3,4</sup>, Xiu-Xian Lin<sup>1, 2,3,4</sup>, Jing Guo<sup>1,2,3,4</sup>, Ying Xu<sup>1,2,3,4</sup>, Song-Xia Zhang<sup>1,2,3,4</sup>, Dan Chen<sup>1,2,3,4</sup>, Qing Zhao<sup>1,2,3,4</sup>, Jian Xiao<sup>5</sup>, Guang-Hui Lian<sup>6</sup>, Shi-Fang Peng<sup>7</sup>, Dong Guo<sup>8</sup>, Hong Yang<sup>8</sup>, Yan Shu<sup>8</sup>, Hong-Hao Zhou<sup>1,2,3,4</sup>, Wei Zhang<sup>1,2,3,4</sup>, **Yao Chen**<sup>1,2,3,4\*</sup>

*1. Department of Clinical Pharmacology, Xiangya Hospital, Central South University, Changsha 410008, Hunan, China.*

*2. Institute of Clinical Pharmacology, Central South University, Changsha 410078, Hunan, China.*

*3. Engineering Research Center of Applied Technology of Pharmacogenomics, Ministry of Education, 110 Xiangya Road, Changsha 410078, P. R. China.*

*4. National Clinical Research Center for Geriatric Disorders, 87 Xiangya Road, Changsha 410008, Hunan, P.R. China.*

*5. Department of Pharmacy, Xiangya Hospital, Central South University, Changsha 410008, Hunan, China.*

*6. Department of gastroenterology, Xiangya Hospital, Central South University, Changsha 410008, Hunan, China.*

*7. Department of Hepatology and Infectious Diseases, Xiangya Hospital, Central South University, Changsha 410008, Hunan, China.*

*8. Department of Pharmaceutical Sciences, School of Pharmacy, University of Maryland, Baltimore, Maryland 21201. USA*

\*Corresponding author: Associate Prof. Yao Chen, Department of Clinical Pharmacology, Xiangya Hospital, Central South University, Changsha, 410008, P.R. China. Phone: +86-731-8480-5380, Email: [cbohua@csu.edu.cn](mailto:cbohua@csu.edu.cn)

*Additional file 1.*

**Table S1. Comparison of odd ratios for NAFLD between different SNP genotypes and their possible influences**

| Gene name      | SNP        | Nucleotide change | Protein change | Compared genotype groups | Odd ratios for NAFLD (95% CI) | P value      | Possible influence                      |
|----------------|------------|-------------------|----------------|--------------------------|-------------------------------|--------------|-----------------------------------------|
| <i>PEMT</i>    | rs7946     | g.17409560C>T     | p.Val212Met    | CT+TT vs CC              | 0.899(0.549-1.472)            | 0.672        | Lipid import/synthesis                  |
| <i>PGC1β</i>   | rs7732671  | g.149212243G>C    | p.Ala203Pro    | TT vs CT+CC              | 0.733(0.143-3.757)            | 0.710        |                                         |
|                |            |                   |                | CG+CC vs GG              | 1.699(0.768-3.758)            | 0.191        |                                         |
| <i>SLC27A5</i> | rs35350976 | g.59023174A>G     | p.Met50Thr     | GC vs GG                 | 1.551(0.892-2.696)            | 0.120        |                                         |
|                |            |                   |                | AG+GG vs AA              | 0.894(0.399-2.006)            | 0.787        |                                         |
|                |            |                   |                | GG vs AG+AA              | 1.429(0.062-32.823)           | 0.823        |                                         |
| <i>PNPLA3</i>  | rs738409   | g.44324727C>G     | p.Ile148Met    | CG+GG vs CC              | 1.080(0.681-1.713)            | 0.744        | Lipid export/oxidation                  |
| <i>MTTP</i>    | rs2306985  | g.100516022C>G    | p.His297Gln    | GG vs CG+CC              | 1.155(0.621-2.148)            | 0.648        |                                         |
|                |            |                   |                | CG+GG vs CC              | 0.930(0.468-1.848)            | 0.836        |                                         |
|                |            |                   |                | GG vs CG+CC              | 1.070(0.680-1.682)            | 0.770        |                                         |
| <i>CYP2E1</i>  | rs6413419  | g.135345675G>T    | p.Val179Phe    | Only GG genotype         | -                             | -            | Lipid peroxidation                      |
| <i>L-FABP</i>  | rs2241883  | g.88424066T>C     | p.Thr94Ala     | <b>CT+CC vs TT</b>       | <b>0.606(0.380-0.968)</b>     | <b>0.036</b> | <b>Cholesterol absorption/synthesis</b> |
|                |            |                   |                | CC vs CT+TT              | 0.955(0.304-3.000)            | 0.937        |                                         |
| <i>FASN</i>    | rs2228305  | g.80042792C>T     | p.Val1483Ile   | CT+TT vs CC              | 1.470(0.125-17.291)           | 0.760        | Fatty acid/triglyceride synthesis       |
|                |            |                   |                | CT vs CC                 | 0.150(0.012-1.834)            | 0.138        |                                         |
| <i>ApoE</i>    | rs440446   | g.45409167C>G     | p.Asn14Lys     | CG+GG vs CC              | 0.925(0.574-1.490)            | 0.749        | VLDL synthesis/export                   |
| <i>mTOR</i>    | rs28990992 | g.11249789G>C     | p.Glu51Asp     | GG vs CG+CC              | 1.067(0.570-1.996)            | 0.839        |                                         |
|                |            |                   |                | CG+CC vs GG              | 0.878(0.377-2.043)            | 0.762        |                                         |
|                |            |                   |                | CC vs CG+GG              | 0.550(0.040-7.529)            | 0.654        |                                         |
| <i>TCF7L2</i>  | rs77961654 | g.114925369C>A    | p.Pro200Thr    | CA+AA vs CC              | 0.948(0.603-1.493)            | 0.819        | Glucose metabolism/insulin resistance   |
|                |            |                   |                | AA vs CA+CC              | 0.895(0.421-1.904)            | 0.773        |                                         |
| <i>PPARG</i>   | rs1801282  | g.12393125C>G     | p.Pro12Ala     | GG vs GC                 | 1.271(0.687-2.351)            | 0.445        |                                         |
| <i>IL6</i>     | rs2069849  | g.22771156C>T     | p.Phe201Leu    | CT vs CC                 | 2.724(0.197-37.696)           | 0.455        | Cytokines                               |
| <i>Fas</i>     | rs3218619  | g.90762801G>A     | p.Ala16Thr     | Only GG genotype         | -                             | -            | Metabolic Stress                        |

|               |            |                |              |                  |                     |       |                                                         |
|---------------|------------|----------------|--------------|------------------|---------------------|-------|---------------------------------------------------------|
| <b>TLR4</b>   | rs4986790  | g.120475302A>G | p.Asp299Gly  | Only AA genotype | -                   | -     | Steatohepatitis-endotoxin response                      |
| <b>LRP6</b>   | rs2302685  | g.12301898C>T  | p.Val1062Ile | CT+TT vs CC      | 0.367(0.035-3.831)  | 0.402 | <b>Wnt/<math>\beta</math>-catenin signaling pathway</b> |
| <b>APC1</b>   | rs459552   | g.112176756T>A | p.Val1822Asp | AT+AA vs TT      | 1.931(0.235-15.894) | 0.541 |                                                         |
| <b>DVL1</b>   | rs61735963 | g.1277183C>T   | p.Ala157Thr  | AA vs AT+TT      | 0.692(0.392-1.219)  | 0.202 |                                                         |
| <b>SIRT3</b>  | rs28365927 | g.236091G>A    | p.Arg80Trp   | Only CC genotype | -                   | -     |                                                         |
|               |            |                |              | GA+AA vs GG      | 1.557(0.927-2.616)  | 0.094 | Apoptosis signaling pathway                             |
|               |            |                |              | AA vs GA+GG      | 0.972(0.150-6.310)  | 0.976 |                                                         |
| <b>HIF3A</b>  | rs3764609  | g.46823702A>G  | p.Gln274Arg  | AG+GG vs AA      | 1.186(0.742-1.895)  | 0.476 | HIF signaling pathway                                   |
|               |            |                |              | GG vs AG+AA      | 1.173(0.639-2.155)  | 0.607 |                                                         |
| <b>NFKBID</b> | rs8113704  | g.36387881A>G  | p.Val181Ala  | GA+GG vs AA      | 1.062(0.618-1.826)  | 0.828 | NFKB signaling pathway                                  |
|               |            |                |              | GG vs GA+AA      | 2.903(0.399-21.121) | 0.292 |                                                         |
| <b>STAT2</b>  | rs2066811  | g.56742997T>C  | p.Ile464Val  | only TT genotype | -                   | -     | JAK-STAT signaling pathway                              |

**Note:** "-" indicates that statistic analysis cannot be performed due to only one genotype group.

**Abbreviations:** *PEMT*, phosphatidylethanolamine N-methyltransferase; *PGC 1 $\beta$* , peroxisome proliferator-activated receptor gamma coactivator 1 $\beta$ ; *SLC27A5*, solute carrier family 27 member 5; *PNPLA3*, patatin-like phospholipase domain-containing protein 3; *MTTP*, microsomal triglyceride transfer protein; *CYP2E1*, cytochrome P450, family 2, subfamily E, polypeptide 1; *FABP1*, fatty acid binding protein 1; *FASN*, fatty acid synthase; *ApoE*, apolipoprotein E; *mTOR*, mechanistic target of rapamycin; *TCF7L2*, transcription factor 7 like 2; *PPARG*, peroxisome proliferator activated receptor gamma; *IL6*, interleukin 6; *Fas*, Fas cell surface death receptor; *TLR4*, toll-like receptor 4; *LRP6*, low density lipoprotein receptor-related protein 6; *APC1*, adenomatous polyposis coli; *DVL1*, dishevelled segment polarity protein 1; *SIRT3*, sirtuin3; *HIF3A*, hypoxia-inducible factor 3-alpha; *NFKBID*, NF-Kappa-B Inhibitor Delta; *STAT2*, signal transducers and activators of transcription 2.

**Additional file 2.**

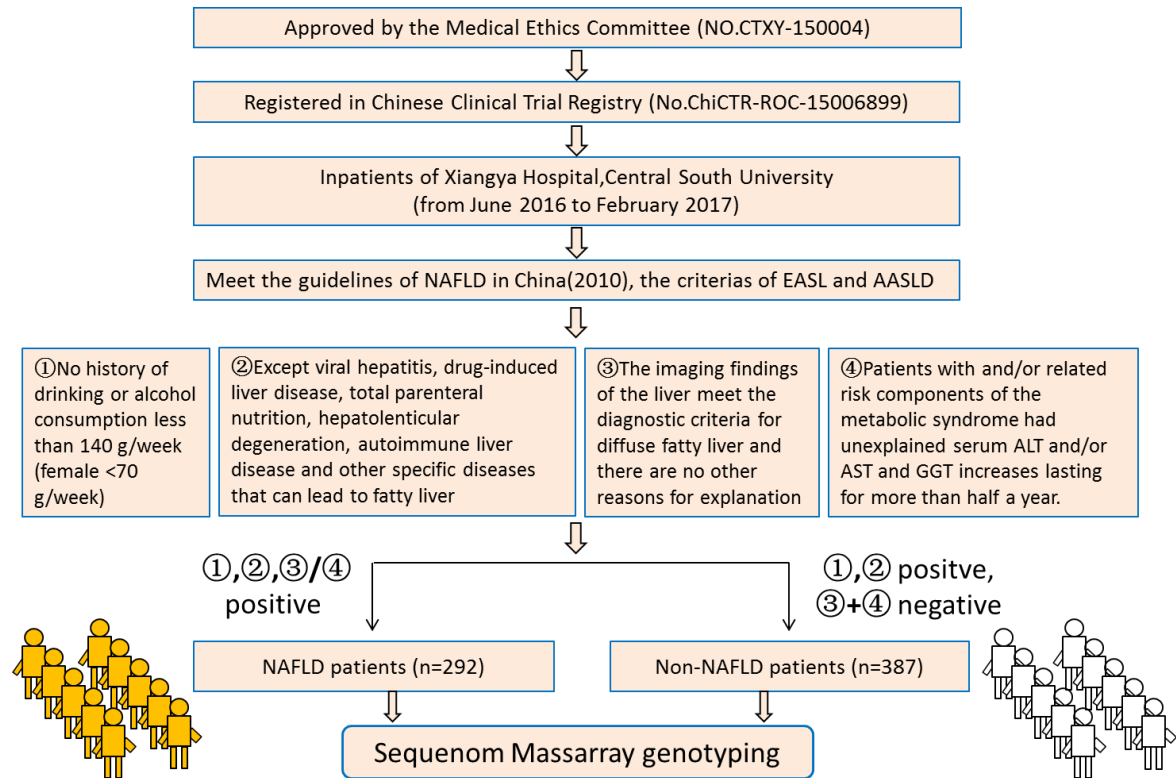

**Figure S1.** Schematic diagram of screening procedures for NAFLD and non-NAFLD subjects in clinical patient blood sample and data collection.

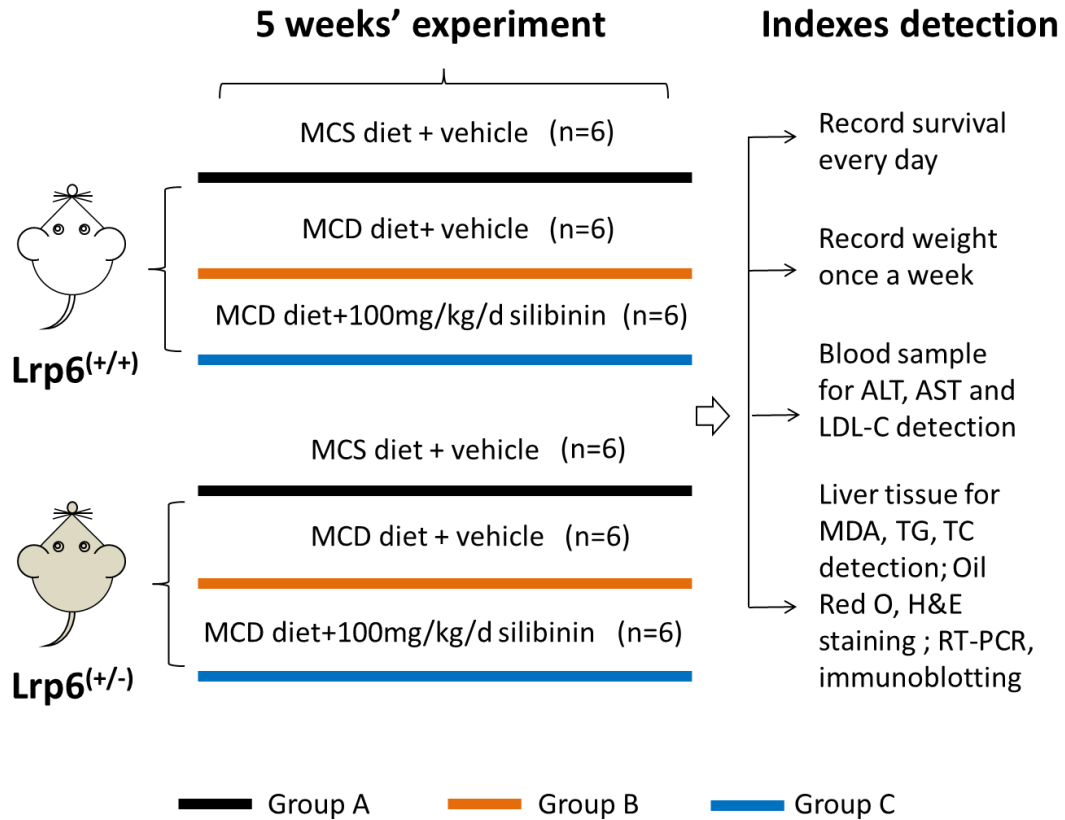

**Figure S2.** The experiment procedure and index detection during MCD diet-induced NAFLD and silibinin treatment between *Lrp6*<sup>(+/+)</sup> and *Lrp6*<sup>(+/-)</sup> mice, with a MCS diet as the control.

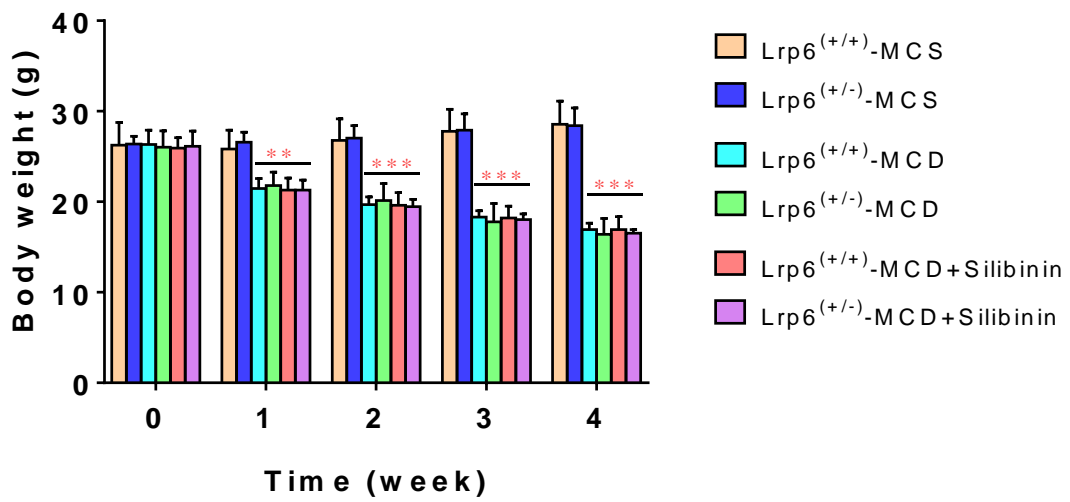

**Figure S3.** The changes in the mice's body weight during NAFLD moulding with and without the treatment of silibinin between the *Lrp6*<sup>(+/+)</sup> and the *Lrp6*<sup>(+/-)</sup> mice groups.

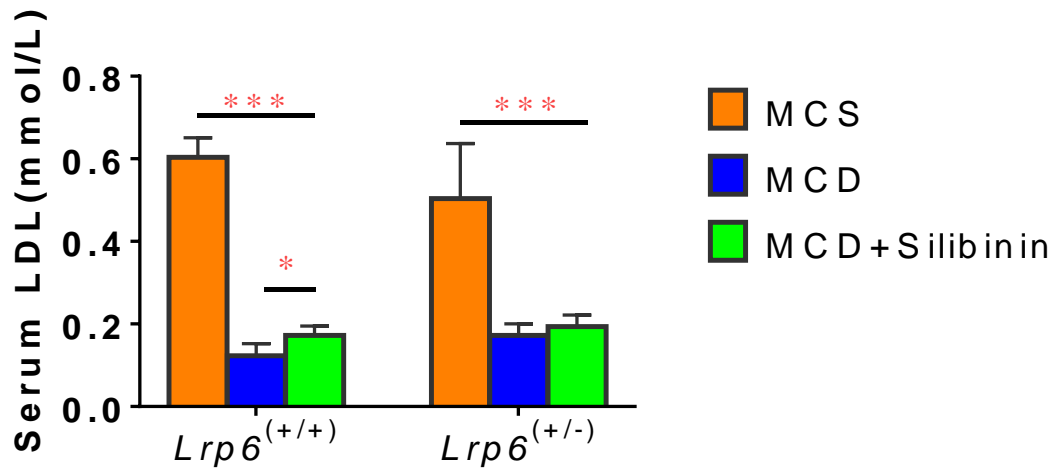

**Figure S4.** Changes in the LDL level during NAFLD moulding with and without the treatment of silibinin between the *Lrp6*<sup>(+/+)</sup> and the *Lrp6*<sup>(+/-)</sup> mice groups.

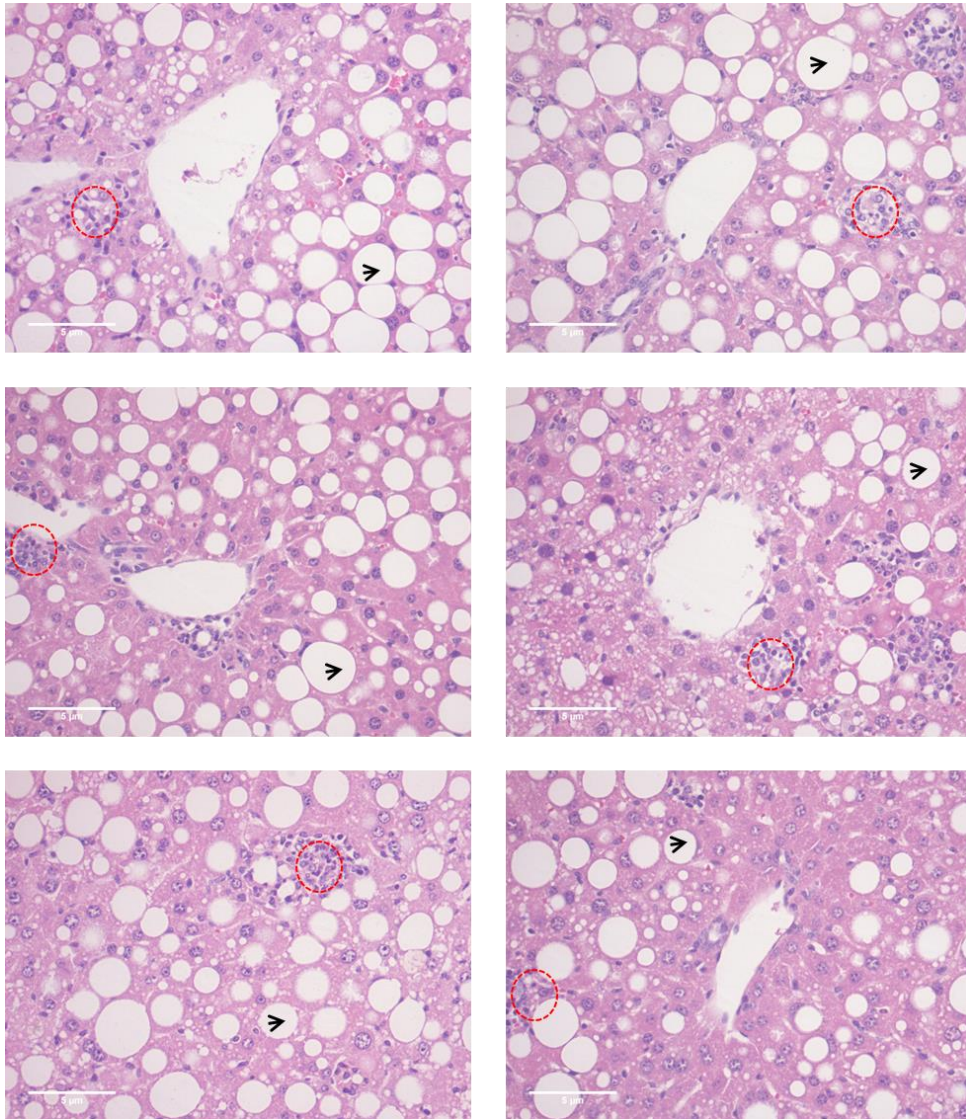

**Figure S5.** Additional H&E figures for inflammatory and fibrotic phenotypes of MCD-induced NAFLD mice model. Macrovesicular steatosis indicated with arrow and necroinflammatory foci indicated with circular broken lines (Scale bar, 5 $\mu$ m).
